1    **Conversion of a soluble protein into a potent chaperone *in vivo***

2    Short title: Intrinsic chaperone activity of a soluble protein

3    Soon Bin Kwon<sup>1</sup>, Kisun Ryu<sup>1</sup>, Ahyun Son<sup>1</sup>, Hotcherl Jeong<sup>2</sup>, Keo-Heun Lim<sup>3</sup>, Kyun-Hwan Kim<sup>3</sup>, Baik L.  
4    Seong<sup>1,4,\*</sup>, & Seong Il Choi<sup>5,\*</sup>

5

6    <sup>1</sup> Department of Biotechnology, College of Life Science and Biotechnology, Yonsei

7    University, Seoul 03722, Republic of Korea

8    <sup>2</sup> Department of Pharmacy, Ewha Womans University, Seoul 03760, Republic of Korea

9    <sup>3</sup> Department of Pharmacology, Center for Cancer Research and Diagnostic Medicine, IBST,  
10    School of Medicine, Konkuk University, Seoul 05029, Republic of Korea

11    <sup>4</sup> Vaccine Translational Research Center (VTRC), Yonsei University, Seoul 03722, Republic  
12    of Korea

13    <sup>5</sup> Department of Biochemistry and Biophysics, Stockholm University, SE-106 91 Stockholm,  
14    Sweden.

15

16    \* Corresponding authors

17    Correspondence should be addressed to S.I.C. ([choisi345@gmail.com](mailto:choisi345@gmail.com)) or B.L.S.

18    ([blseong@yonsei.ac.kr](mailto:blseong@yonsei.ac.kr)).

19

20 **Abstract**

21 Protein-folding assistance and aggregation inhibition by cellular factors are largely  
22 understood in the context of molecular chaperones. As an alternative and complementary  
23 model, we previously proposed that, in general, soluble cellular macromolecules including  
24 chaperones with large excluded volume and surface charges exhibit the intrinsic chaperone  
25 activity to prevent aggregation of their connected polypeptides, irrespective of the connection  
26 types, and thus to aid productive protein folding. As a proof of concept, we here  
27 demonstrated that a model soluble protein with an inactive protease domain robustly exerted  
28 chaperone activity toward various proteins harboring a short protease-recognition tag of 7  
29 residues in *Escherichia coli*. The chaperone activity of this protein was similar or even  
30 superior to that of representative *E. coli* chaperones *in vivo*. Furthermore, *in vitro* refolding  
31 experiments confirmed the *in vivo* results. Our findings revealed that a soluble protein  
32 exhibits the intrinsic chaperone activity, which is manifested, upon binding to aggregation-  
33 prone proteins. This study gives new insights into the ubiquitous chaperoning role of cellular  
34 macromolecules in protein-folding assistance and aggregation inhibition underlying the  
35 maintenance of protein solubility and proteostasis *in vivo*.

36

## 37 **Abbreviations**

|    |          |                                                                |
|----|----------|----------------------------------------------------------------|
| 38 | Ap1m2    | AP-1 complex subunit mu-2                                      |
| 39 | DnaKJE   | DnaK-DnaJ-GrpE                                                 |
| 40 | EGFP     | Enhanced Green Fluorescent Protein                             |
| 41 | GCSF     | Granulocyte colony stimulating factor                          |
| 42 | GroELS   | GroEL-GroES                                                    |
| 43 | HBx      | Hepatitis B virus X protein                                    |
| 44 | hMDH     | Malate Dehydrogenase from <i>Homo sapiens</i>                  |
| 45 | HSP      | Heat Shock Protein                                             |
| 46 | IPTG     | isopropyl $\beta$ -D-1-thiogalactopyranoside                   |
| 47 | mTEV     | Tobacco etch virus protease domain with C151A mutation         |
| 48 | mTEVsw   | Tobacco etch virus protease domain variant with C151A mutation |
| 49 | RS       | Lysyl-tRNA synthetase of <i>Escherichia coli</i>               |
| 50 | SDS-PAGE | Sodium dodecyl sulfate polyacrylamide gel electrophoresis      |
| 51 | TF       | Trigger Factor                                                 |

52

## 53 **Introduction**

54 How metastable proteins with respect to aggregation fold efficiently and maintain their  
55 solubility in the crowded cellular environment has been a fundamental yet unsolved question  
56 in biology [1-4]. Protein aggregation is closely associated with the numerous human  
57 disorders, including neurodegeneration [5]. Molecular chaperones and principles underlying  
58 their action mechanisms have provided the conceptual frameworks for understanding of  
59 protein-folding assistance, aggregation inhibition, and proteostasis *in vivo* [6, 7]. However,  
60 chaperones are ineffective for numerous aggregation-prone proteins [8], and they need to be  
61 understood with caveats, given accumulating evidence. Chaperones generally assist protein  
62 folding by preventing off-pathway “intermolecular” aggregation (or increasing the final  
63 folding yield), often at the expense of the “intramolecular” folding rate or thermodynamic  
64 stability of substrate proteins [9-11]. By contrast, in some cases, chaperones can increase the  
65 folding rate of client proteins as folding catalysts [12-14]. Both action mechanisms of  
66 chaperones are basically different although they are not mutually exclusive.

67 Chaperones commonly recognize and bind to the exposed hydrophobic residues of  
68 non-native or unfolded polypeptides, thereby enabling protein quality control [3, 6, 7]. These  
69 findings led to widespread beliefs in 1) the hydrophobic interaction-mediated substrate  
70 recognition of chaperones; and 2) such interaction-mediated substrate stabilization against  
71 aggregation [3, 4, 7, 15]. However, several lines of evidence challenge these prevailing  
72 mechanisms. Chaperones, such as Spy and Trigger Factor (TF), can recognize and bind to the  
73 surface-exposed charged regions of substrates [16, 17], and the endoplasmic reticulum lectin  
74 chaperones calnexin/calreticulin bind to the carbohydrate parts of their substrate proteins [18].  
75 Moreover, GroEL and TRiC/CCT can also recognize their substrates mainly through  
76 electrostatic interactions [19, 20]. These findings naturally raise a fundamental question  
77 regarding how chaperones stabilize their substrates, which are connected via non-

78 hydrophobic interactions, against aggregation. Contrary to such widespread belief, it remains  
79 poorly defined what forces (or factors) of chaperones or other cellular macromolecules are  
80 responsible for stabilizing their bound substrates against aggregation. This is primarily due to  
81 the inherent difficulty of this study, including conformational changes of macromolecules  
82 and irreversible aggregation. Intriguingly, the surface-charge patches of heat-shock protein  
83 90 (HSP90) are critical for the anti-aggregation activity for its substrate proteins, although the  
84 charge patches are located away from the substrate-binding regions [21]. Similarly, the  
85 substrate-stabilizing ability of HSP70 resulted largely from its N-terminal domain rather than  
86 its C-terminal substrate-binding domain in the context of covalent fusion [22], suggesting that  
87 the substrate-interaction forces of chaperones do not necessarily represent the major  
88 substrate-stabilizing forces against aggregation.

89 We previously proposed a *cis*-acting protein-folding helper system, which appears to  
90 operate differently from the classical *trans*-acting chaperones [4, 23]. A hallmark feature of  
91 the cellular folding environment is that nascent polypeptides are tethered to the cellular  
92 macromolecules, such as ribosomes (2000–3200 kDa), membranes, or cotranslationally  
93 folded (or prefolded) domains in multi-domain proteins. *De novo* protein folding on these  
94 cellular macromolecules has been a major issue in terms of chaperone function [7, 24-26],  
95 but the tethering effect of such macromolecules has long been underappreciated. However,  
96 based on the robust chaperone-like activity of these macromolecules, as well as a variety of  
97 highly soluble proteins, toward various heterologous aggregation-prone proteins in the fusion  
98 context (or in *cis*) [27-30], this *cis*-acting chaperone-like type was proposed to play a pivotal  
99 role in the folding and aggregation inhibition of endogenous proteins [23]. Consistent with  
100 this *cis*-acting model, several lines of evidence indicate that the cytosol-exposed nascent  
101 chains tethered to ribosomes are aggregation-resistant and co-translational folding-competent  
102 [31-34]. Remarkably, intermolecular repulsive (or destabilizing) forces, such as electrostatic

103 and steric repulsions by the surface charges and excluded volume of cellular macromolecules,  
104 were proposed to stabilize their tethered polypeptides against aggregation independently of  
105 the attractive intermolecular interactions and their effect on the conformational changes,  
106 while the tethered polypeptides can fold based on their own sequence information in the  
107 absence of adenosine triphosphate (ATP) consumption [4, 23]. This stabilizing mechanism  
108 can underlie the intrinsic chaperone activity of soluble macromolecules. The magnitudes of  
109 these intermolecular repulsive forces were suggested to increase corresponding to the size  
110 and surface charge of the molecules [22, 23]. Importantly, these two forces have been well  
111 known as major factors in stabilizing colloids against aggregation [35, 36]. This stabilizing  
112 mechanism well explains the surface-charge effect of HSP90 on anti-aggregation, as well as  
113 obvious charge effects on protein solubility [4, 23]. Similarly, entropic bristling and  
114 hydration by the excluded volume and charged residues of intrinsically disordered proteins or  
115 regions were proposed to solubilize their fused proteins [37, 38]. Moreover, the entropic  
116 pulling forces of HSP70 resulting from its excluded volume repulsions were proposed to  
117 underlie its diverse functions [39]. Nonetheless, so far, the aggregation inhibition by the  
118 intermolecular repulsive forces of cellular macromolecules has been largely ignored; instead,  
119 the aggregation inhibition has been explained predominantly in the context of the direct  
120 attractive interactions between cellular macromolecules and polypeptides. It should be noted  
121 that both action mechanisms act independently and simultaneously.

122 Importantly, large excluded volume and surface charges are the common intrinsic  
123 properties of any type of soluble cellular macromolecule including chaperones. This  
124 prompted us to hypothesize that cellular macromolecules exhibit the intrinsic chaperone  
125 activity, and thus they act as chaperones for their connected polypeptides irrespective of the  
126 connection types between them [4, 40]. To test this hypothesis, we here constructed a *trans*-  
127 acting artificial chaperone system. Our results revealed that a model soluble protein exhibits

128 the intrinsic chaperone activity to recapitulate the core features of the classical chaperones,  
129 such as aggregation inhibition and folding assistance, upon binding to aggregation-prone  
130 proteins in *E. coli*.

## 131 **Results**

### 132 **Design of an artificial chaperone system *in vivo***

133 To explore the intrinsic chaperone activity of a soluble protein, we designed an artificial  
134 chaperone system in which a model soluble protein (named RS-mTEV) specifically binds to  
135 a short flanking tag of 7 residues in the substrate proteins (**Fig 1**). As a substrate-binding  
136 module of RS-mTEV, we chose a mutant protease domain of tobacco etch virus (mTEV)  
137 with no proteolytic activity, but still maintaining the binding affinity for its canonical  
138 recognition sequence (ENLYFQG) [41]. This protease domain is marginally soluble when  
139 expressed alone at 37 °C [42]. To increase mTEV solubility, it was fused to the C-terminus of  
140 *E. coli* lysyl tRNA synthetase (RS; 57 kDa), which is known to be a solubility-enhancing  
141 fusion partner [30], resulting in a more soluble RS-mTEV protein (**S1 Fig**). As a client  
142 protein of RS-mTEV, enhanced green fluorescent protein (EGFP) was fused to hepatitis B  
143 virus X protein (HBx) with intrinsically disordered regions [43], to yield L-EGFP-HBx where  
144 “L” denotes the recognition sequence (ENLYFQG). This model system was designed to  
145 minimize the direct binding except for the “L” tag between RS-mTEV and its client protein  
146 during folding and aggregation processes to assess the intrinsic RS-mTEV chaperone activity.  
147 Moreover, the substrate-binding domain (mTEV) is separated as an independent module from  
148 the solubility-enhancing module (RS) in RS-mTEV, providing a unique opportunity to  
149 distinguish between the contributions of the two modules to RS-mTEV chaperone function  
150 later.

151

### 152 **RS-mTEV acts as a potent chaperone for its client proteins *in vivo***

153 We investigated the effect of RS-mTEV co-expression on both L-EGFP-HBx solubility and  
154 folding in *E. coli* using two co-expression vectors. Information about these vectors is  
155 described in more detail (**S2 Fig**). RS-mTEV co-expression markedly increased L-EGFP-



156 HBx solubility by ~75%, whereas RS co-expression did not increase the solubility (~16%)  
157 similar to the corresponding solubility (~12%) in background cells containing a mock vector  
158 pLysE as a control (**Fig 2a**). We further confirmed that a specific binding of RS-mTEV to the  
159 “L” tag in L-EGFP-HBx increased the protein solubility. The residue N171 in mTEV is  
160 important for the substrate recognition [41]; therefore, this mutation in RS-mTEV [named  
161 RS-mTEV(N171A)] resulted in a significantly impaired substrate-binding ability (**S3 Fig**).  
162 Correspondingly, RS-mTEV(N171A) had no detectable solubility-enhancing ability for the  
163 substrate protein (**Fig 2a**). Similarly, the solubility of L(m)-EGFP-HBx with the mutation in  
164 the “L” tag (ENLYFQG to YNLEFQG) did not respond to RS-mTEV co-expression. Other  
165 mutations in the conserved recognition sequence of “L” tag consistently resulted in little or  
166 no effect on the protein solubility like L(m)-EGFP-HBx (**S4 Fig**). As expected, EGFP-HBx  
167 solubility without the recognition sequence “L” was unaffected by RS-mTEV co-expression  
168 (**Fig 2a**). These results clearly demonstrated that RS-mTEV increased the protein solubility  
169 via its specific binding to the “L” tag in L-EGFP-HBx *in vivo*. Western blot analysis of the  
170 substrate proteins using an anti-GFP antibody was in accordance with their corresponding  
171 expression patterns on the above sodium dodecyl sulfate polyacrylamide gel electrophoresis  
172 (SDS-PAGE) results. We then investigated the folding quality of the proteins solubilized by  
173 RS-mTEV co-expression by measuring EGFP fluorescence intensity in soluble fractions  
174 containing the substrate proteins. Solubility enhancement or aggregation inhibition, as  
175 important elements for biological relevance, does not necessarily represent proper folding.  
176 We observed correlations between EGFP fluorescence intensity and L-EGFP-HBx solubility  
177 resulting from RS-mTEV co-expression (**Fig 2a**), indicating that RS-mTEV promoted both  
178 solubility and folding of its client protein. The results (**Fig 2a**) revealed that RS-mTEV  
179 exhibits the intrinsic chaperone activity.

180 We further investigated the dosage effects of co-expressed RS-mTEV on L-EGFP-  
181 HBx solubility and folding. The increased amounts of co-expressed RS-mTEV protein with  
182 increasing L-arabinose concentration (0 %, 0.0022%, 0.0066%, and 0.02%) promoted both L-  
183 EGFP-HBx solubility and EGFP fluorescence in an RS-mTEV dosage dependent manner  
184 (**Fig 2b**). By contrast, the increase in RS co-expression had no effect on L-EGFP-HBx  
185 solubility and EGFP fluorescence under the same condition (**Fig 2b**). These results (**Fig 2**)  
186 showed that RS-mTEV was readily converted into a potent chaperone *in vivo* if simply  
187 connected to an aggregation-prone protein *in trans*.

188

### 189 **RS-mTEV acts as a chaperone independently of the recognition-tag position**

190 One of the advantages of our artificial chaperone system is that the position of the recognition  
191 tag in the substrate proteins can be changed. The intrinsic chaperone activity of RS-mTEV  
192 led us to predict that RS-mTEV should act as a chaperone, independently of the position of  
193 the recognition tag in the substrate proteins. To test this scenario, the “L” tag was placed  
194 either in the middle between EGFP and HBx (EGFP-L-HBx) or at the C-terminus of the  
195 protein (EGFP-HBx-L). RS-mTEV co-expression increased the solubility of both EGFP-L-  
196 HBx and EGFP-HBx-L (from 49% to 86% and from 12% to 73%, respectively) (**Fig 3**).  
197 Consistently, the EGFP fluorescence intensity of the substrate proteins in the soluble  
198 fractions was positively correlated with their solubility (**Fig 3**). These results have shown that  
199 RS-mTEV acts as a chaperone for its substrate proteins independently of the recognition-tag  
200 position, giving further credence to the intrinsic chaperone activity of RS-mTEV. In the cases  
201 of L-EGFP-HBx and EGFP-L-HBx, we do not know whether RS-mTEV acted co- or post-  
202 translationally. EGFP-HBx-L clearly indicated that RS-mTEV acted at least post-  
203 translationally, thereby broadening the generality of our system.

204

205 **RS-mTEV is more efficient than the classical chaperones.**

206 The representative chaperones, including GroEL-GroES (GroELS), the DnaK-DnaJ-GrpE  
207 system (DnaKJE), and TF, have been well known to prevent aggregation and assist protein  
208 folding in *E. coli* [7, 9, 26]. Here, we compared RS-mTEV chaperone activity with that of  
209 these classical chaperones for L-EGFP-HBx, EGFP-HBx-L, and EGFP-HBx proteins. When  
210 co-expressed individually with RS, RS-mTEV, GroELS, DnaKJE, and TF, the corresponding  
211 solubility of the 3 substrate proteins were observed to be 16%, 72%, 20%, 81%, and 64% for  
212 L-EGFP-HBx, and 12%, 71%, 16%, 82%, and 41% for EGFP-HBx-L, and 10%, 9.8%, 14%,  
213 86%, and 33% for EGFP-HBx (**Fig 4a and c**). The co-expression of the chaperones was  
214 confirmed (**S5 Fig**). The results showed that, like RS-mTEV, DnaKJE and TF substantially  
215 increased the solubility of L-EGFP-HBx and EGFP-HBx-L to the similar levels, whereas  
216 GroELS increased little, similar to RS. Furthermore, the EGFP fluorescence intensities of the  
217 soluble extracts were correlated with the corresponding solubility of the target proteins upon  
218 co-expression with each chaperone, except for DnaKJE (**Fig 4b**). TF increased both the  
219 solubility and folding of client proteins more efficiently than GroELS and DnaKJE. Notably,  
220 RS-mTEV was shown to be similar to TF regarding the chaperone activity.

221 We additionally compared the solubility-enhancing effects of RS-mTEV with the  
222 representative chaperones for different substrate proteins, including human endostatin,  
223 granulocyte colony stimulating factor (GCSF), AP-1 complex subunit mu-2 (Ap1m2), and  
224 malate dehydrogenase (hMDH) with the “L” tag at their N-termini. These aggregation-prone  
225 proteins have been known to be involved in cell proliferation or signaling pathways [44-47].  
226 Upon individual co-expression of RS, RS-mTEV, GroEL/ES, DnaKJE, and TF, the  
227 corresponding solubility were 5%, 47%, 14%, 28%, and 11% for endostatin; 44%, 85%, 53%,  
228 87%, and 94% for GCSF; 7%, 70%, 13%, 36%, and 32% for Ap1m2; and 22%, 79%, 50%,  
229 52%, and 39% for hMDH, respectively (**Fig 4a and c**). These results showed that RS-mTEV

230 robustly increased the solubility of all tested proteins, and that its solubility-enhancing  
231 activity was higher than or similar to that of the representative chaperones. In contrast to the  
232 substrate preferences of the classical chaperones, RS-mTEV provided the chaperone function  
233 for all client proteins tested. The overall results (**Fig 4**) indicate that RS-mTEV is more  
234 efficient than the classical chaperones.

235

### 236 **RS-mTEV chaperone activity largely results from RS rather than mTEV.**

237 As described in Introduction, the substrate-stabilization against aggregation by the surface  
238 charges of HSP90, the N-terminal domain of HSP70, and the intermolecular repulsive (or  
239 destabilizing) forces of soluble macromolecules appear to act allosterically; long-range  
240 chaperone effects exist even in the absence of direct contact with the aggregation-prone  
241 regions of the connected polypeptides. This (apparent) allosteric mechanism underlies the  
242 concept of the intrinsic chaperone activity of soluble cellular macromolecules. One would  
243 therefore expect that RS-mTEV chaperone activity might be mediated by RS after RS-mTEV  
244 binding to the “L” tag of client proteins. To test this, we investigated and compared the  
245 chaperone effects of three proteins (mTEV without fusion, N-mTEV [N: N-terminal domain  
246 (15 kDa) of RS], and RS-mTEV) on L-EGFP-HBx solubility and folding at low-temperature  
247 (25 °C), where the solubility of all three proteins is high (**Fig 5a**). Although the three proteins  
248 share the same substrate-binding module (mTEV), RS-mTEV was superior to mTEV and N-  
249 mTEV at promoting L-EGFP-HBx solubility, whereas N-mTEV chaperone activity was  
250 slightly higher than that of mTEV (**Fig 5b and d**). To further confirm RS-mediated  
251 chaperone activity, we used a more soluble TEV variant (TEV<sub>sw</sub>) [48] harboring the same  
252 mutation in the TEV domain to block protease activity, yielding mTEV<sub>sw</sub>. The mTEV<sub>sw</sub>  
253 without fusion was highly soluble, even at 37 °C (**Fig 5a and S1 Fig**). Despite the increased  
254 solubility of mTEV<sub>sw</sub> relative to mTEV, mTEV<sub>sw</sub> without the RS fusion failed to show

255 detectable chaperone activity for L-EGFP-HBx, whereas RS-mTEV<sub>sw</sub> consistently increased  
256 L-EGFP-HBx solubility (**Fig 5c and d**). The significant amounts of both mTEV and  
257 mTEV<sub>sw</sub> were observed to co-precipitate with L-EGFP-HBx (**Fig 5b and c**). Consistent with  
258 the aforementioned allosteric mechanisms, our findings indicate that RS-mTEV chaperone  
259 activity results largely from RS rather than mTEV, although mTEV is critical for the  
260 substrate binding. Conversely, both the attractive interactions between mTEV module and L-  
261 EGFP-HBx and the probable conformational changes of L-EGFP-HBx by the attractive  
262 interactions cannot be sufficient to describe the RS-mediated allosteric chaperone effect.

263

#### 264 ***In vitro* refolding experiments support RS-mTEV chaperone function.**

265 To characterize RS-mTEV chaperone function more clearly, *in vitro* refolding experiments  
266 using EGFP-HBx-L as a substrate protein were performed in the presence and absence of RS-  
267 mTEV. GuHCl-denatured EGFP-HBx-L (80  $\mu$ M) was 50-fold diluted into the refolding  
268 buffer containing 2.5  $\mu$ M RS-mTEV, RS, or phosphate-buffered saline (PBS), and refolding  
269 was monitored by following EGFP fluorescence at various time points (0–75 min) at 30 °C.  
270 RS-mTEV increased the final refolding yield by  $\sim 1.7$  fold high, compared to RS and PBS  
271 (**Fig 6a**). Furthermore, consistent with the *in vivo* results (**Fig 2b**), the refolding yields were  
272 increased with an RS-mTEV concentration dependence (0–5  $\mu$ M; **Fig 6b**). By contrast, RS  
273 failed to show any detectable chaperone activity, even at the highest concentration tested (**Fig**  
274 **6a and b**). The final refolding yields of RS-mTEV, RS, and PBS did not converge to the  
275 same value (**Fig 6a**), indicating that the difference in the final fluorescence signals resulted  
276 from irreversible aggregation of the substrate proteins. This implies that RS-mTEV likely  
277 assisted protein folding by preventing off-pathway aggregation. To confirm this possibility,  
278 *in vitro* refolding was performed at substrate concentrations 10-fold lowered (**Fig 6c**), where  
279 intermolecular aggregation was minimized. Under these conditions, RS-mTEV chaperone

280 activity was substantially attenuated (**Fig 6c**), indicating that RS-mTEV assisted protein  
281 folding largely by preventing intermolecular aggregation rather than accelerating the folding  
282 rate.

283 To further confirm *in vitro* RS-mTEV chaperone activity via the specific binding to  
284 its canonical recognition sequence in the substrate protein, we investigated the effect of  
285 competing peptides on the RS-mTEV chaperone activity. The sequence of the competitive-  
286 inhibitor peptide was flanked by TT and GT (TT-ENLYFQS-GT), whereas that of the control  
287 peptide represented the inverted form of the canonical recognition sequence (TT-SQFTLNE-  
288 GT) harboring a single point mutation in the middle. Addition of the competitive-inhibitor  
289 peptide to the refolding buffer abolished RS-mTEV chaperone activity to the level of the  
290 control, whereas the control peptide had no inhibitory effect on RS-mTEV chaperone activity  
291 (**Fig 6d**). These results demonstrated that *in vitro* RS-mTEV chaperone activity resulted from  
292 its specific binding to the canonical recognition sequence.

293

294

## 295 Discussion

296 In this study, we have shown that a soluble protein exhibits the intrinsic chaperone activity in  
297 terms of aggregation inhibition and folding assistance. A soluble model protein, RS-mTEV,  
298 displayed the robust chaperone activity for its client proteins via a specific binding to the “L”  
299 tag of 7 residues (**Figs 2a, 3, and 4**). The fluorescence intensity of EGFP-HBx fusion  
300 proteins was followed to assess proper folding because of the absence of an *in vitro* HBx  
301 assay [49, 50]. In particular, our artificial chaperone system is suitable to explore the intrinsic  
302 chaperone activity of a soluble protein due to the following reasons. The “L” tag is very short  
303 and located at the “flanking” regions of the client proteins, minimizing the interactions  
304 between RS-mTEV and the client proteins, except for the “L” tag. Moreover, RS-mTEV  
305 exhibited a high degree of specificity for the “L” tag (**Figs 2a and 6d**), consistent with a  
306 previous report [41]. Similar to such separation of the substrate protein into two parts, RS-  
307 mTEV comprises two distinct regions, a solubility-enhancing module (RS) and a client-  
308 binding module (mTEV), allowing us to distinguish between the contributions of RS and  
309 mTEV to the chaperone activity of RS-mTEV (**Fig 5**). The RS-mediated allosteric chaperone  
310 activity in RS-mTEV is in a good accordance with the chaperone activity by the surface  
311 charges of HSP90 [21] and the N-terminal domain of HSP70 [22]. Consistently, the intrinsic  
312 chaperone activity of soluble macromolecules due to their intermolecular steric and  
313 electrostatic repulsions appear to act allosterically; soluble macromolecules can act as  
314 chaperones without direct attractive interactions with the aggregation-prone regions of their  
315 connected polypeptides [4, 23, 37, 39]. All our findings indicate that RS-mTEV exhibits the  
316 intrinsic chaperone activity, which is visible, upon binding to the aggregation-prone proteins.

317 The concept of the intrinsic chaperone activity of a soluble protein can be generally  
318 applicable to cellular macromolecules. This highlights the fundamental importance of our  
319 findings. Aggregation-prone polypeptides in the crowded cytosol are physically connected to

320 a variety of cellular macromolecules, including chaperones, through a combination of diverse  
321 interactions (covalent/noncovalent, hydrophobic/hydrophilic, transient/permanent,  
322 specific/unspecific, direct/indirect, and native/nonnative) [4]. Individual proteins are  
323 estimated to continuously interact with the five putative partners in the *E. coli* cytoplasm [51],  
324 making quinary interactions with macromolecules inside cells [52]. Our study implies that the  
325 above cellular macromolecules potentially act as chaperones for their connected polypeptides  
326 irrespective of their connection types. Previously, the intrinsic properties (e.g., excluded  
327 volume and surface charges) of soluble proteins and domains were suggested to underlie their  
328 robust chaperone activity *in cis* by genetic fusion to aggregation-prone proteins [23].  
329 However, such intrinsic *cis*-acting chaperone activity remains challenging to explore,  
330 although it is phenomenologically robust. To facilitate the investigation of such *cis*-acting  
331 effects of cellular macromolecules, we initially designed this *trans*-acting system, allowing  
332 the independent control of RS-mTEV *in vivo* and *in vitro*. Interestingly, classic chaperones  
333 can be converted into potent *cis*-acting solubility enhancers [22, 53, 54], and ribosomes can  
334 act as chaperones both in *trans* and in *cis* [27, 34, 55, 56]. Here, RS, a potent solubility  
335 enhancer in *cis* [30], provided the *trans*-acting chaperone activity as a component of RS-  
336 mTEV (**Fig 5**). All these results show that despite the change in the connection types between  
337 the chaperones and their substrates, their chaperone activity persist. Similarly, endoprotease  
338 DegP (HtrA) is converted into a chaperone under different conditions [57], with many other  
339 protease components previously shown to exhibit chaperone-like activity [58]. Furthermore,  
340 various RNAs, highly soluble macromolecules, have been increasingly reported to act as  
341 potent chaperones [30, 34, 59-63]. The concept of the intrinsic chaperone activity of the  
342 cellular macromolecules in our study can underlie the aforementioned diverse chaperone  
343 types. So far, the evolution of the classical chaperones remains largely unknown. Our study



344 implies that soluble macromolecules including protease mutants can be easily converted into  
345 chaperones if they have the ability to bind aggregation-prone proteins.

346         The (apparent) allosteric effect of RS in RS-mTEV on its client protein (**Fig 5**) might  
347 be well explained by intermolecular repulsive (or destabilizing) forces exerted by their  
348 excluded volume and surface charge. The allosteric modulation of protein aggregation by  
349 cellular macromolecules represents a potential mechanism for intervening in aggregation-  
350 associated neurodegenerative diseases, as well as for protein solubility *in vivo*. For example,  
351 a bulky protein conjugated to amyloid-specific binding dye dramatically inhibits the amyloid  
352 formation due to its steric hindrance or excluded volume repulsion [64], consistent with the  
353 intrinsic chaperone activity and the allosteric modulation of RS in RS-mTEV. Our findings  
354 imply that the cellular macromolecules that bind to the flanking or remote sites away from  
355 aggregation-prone regions in proteins and peptides might be potential drug targets for protein  
356 aggregation-associated diseases.

357         Taken together, the present study on the intrinsic chaperone activity of a soluble  
358 protein has a huge impact on the field of chaperones, and provides new insights into the  
359 generic chaperoning role of cellular macromolecules, which is associated with the cellular  
360 protein folding, aggregation inhibition, proteostasis, aggregation-associated diseases, and  
361 protein production technology.

362

## 363 **Materials and Methods**

### 364 **Cloning**

365 We used two different types of vectors for co-expression (pGE and pLysE vectors) (**S2 Fig**).  
366 The pGE vectors originated from pGE-LysRS [30], and pLysE vectors were obtained from  
367 Merck Chemicals GmbH (Novagen; Darmstadt, Germany). First, the pBAD promoter was  
368 inserted into the *NruI* and *AvaI* restriction sites of pLysE, producing the pLysEpBAD vector  
369 with a new *HpaI* site at the flanking regions of the pBAD promoter. We inserted the  
370 sequences for RS, RS-mTEV, variants of RS-mTEV, and the molecular chaperones into the  
371 pLysEpBAD vector, respectively. Sequences for client proteins, including EGFP-HBx  
372 variants, endostatin, GCSF, Ap1m2, and hMDH, were inserted into the *NdeI* and restriction  
373 sites in the multi-cloning site (*HindIII*, *HindIII*, *SalI*, and *HindIII*, respectively) in the  
374 presence or absence of the TEV protease-recognition sequence in the pGE vector. The MSEQ  
375 amino acid sequence was inserted at the N-terminus of substrate proteins to increase the  
376 expression level of proteins (**S6 Fig**).

377

### 378 **Protein expression**

379 Competent cells [*E. coli* BL21(DE3)] were co-transformed with the aforementioned vectors,  
380 cells were grown, and proteins in the cells were analyzed as previously reported[30], with  
381 some modifications. The expression of proteins from the pLysEpBAD vector was induced  
382 with 0.02% L-arabinose unless otherwise mentioned, followed by culturing at 25 °C for 1.5 h.  
383 Then, the cells were treated with IPTG tailored to the expression of each client protein as  
384 follows: 50 µM for EGFP-HBx and hMDH, 75 µM for endostatin, 200 µM for GCSF, and  
385 150 µM for Ap1m2. Cells treated with IPTG were cultured at 25 °C for an additional 4 h. The  
386 harvested cells were lysed by sonication in PBS, and target-protein solubility in samples was  
387 analyzed by SDS-PAGE. All experiments with error bars were performed in triplicate.

388

389 **Western blot**

390 Lysate samples were loaded onto polyacrylamide gels and transferred to a polyvinylidene  
391 difluoride membrane (ISEQ00010; Millipore, Billerica, MA, USA) according to a previously  
392 reported protocol[65]. Anti-GFP (632377; Clontech Laboratories, Mountain View, CA, USA)  
393 and anti-Penta His (34660; QIAGEN, Hilden, Germany) were used as primary antibodies,  
394 and anti-rabbit IgG (A6154; Sigma-Aldrich, St. Louis, MO, USA) and anti-mouse IgG  
395 (A4416; Sigma-Aldrich, St. Louis, MO, USA) were used as secondary antibodies.

396

397 **Fluorescence assay of EGFP-fused proteins**

398 The fluorescence of EGFP-HBx variants was measured to investigate the proper folding of  
399 proteins. Each soluble fraction of lysed samples was normalized to cellular optical density  
400 and added to the well of a 96-well plate (30496; SPL Life Sciences, Gyeonggi-do, Korea).  
401 The fluorescent intensity of samples was determined at 485 nm (excitation) and 520 nm  
402 (emission), with FLUOstar OPTIMA (BMG Labtech, Cary, NC, USA) used to measure the  
403 fluorescence of each well.

404

405 ***In vitro* refolding**

406 Purified EGFP-HBx-L proteins in denaturing buffer [50 mM Tris-HCl (pH 7.5), 300 mM  
407 NaCl, 6 M GuHCl, 1 mM DTT, and 1 mM EDTA] were supplemented with 50 mM DTT for  
408 30 min before use. The denatured and reduced protein mixtures were 50-fold diluted into  
409 refolding buffer [50 mM Tris-HCl (pH 7.5), 150 mM NaCl, and 5 mM MgCl<sub>2</sub>] and incubated  
410 at 30 °C. Different concentrations of RS or RS-mTEV were added to refolding buffer along  
411 with 1 mM DTT. For each time-course refolding experiment, four individual samples were  
412 prepared for monitoring the refolding reaction as a function of time (0, 15, 45, and 75 min)

413 where 0 min corresponds to the sample before dilution of denatured proteins into the  
414 refolding buffer. After the initiation of the refolding for 0, 30, 60 min, the samples were  
415 centrifuged at 15,000  $x$  g for 15 min at 30 °C, making the total refolding time 15, 45, and 75  
416 min, respectively. Green fluorescence intensity in the supernatant of each sample was  
417 measured. We used RS-mTEV<sub>sw</sub> for the refolding experiments, which exhibits better  
418 stability and solubility than its prototype [48]. When testing 10-fold lower concentrations of  
419 EGFP-HBx-L, 1 mg/mL bovine serum albumin was added to the refolding buffer to reduce  
420 loss of the substrate protein due to nonspecific adsorption. All refolding experiments were  
421 performed in triplicate.

422

#### 423 **Competitive inhibition of refolding**

424 Peptides (5 mM; TT-ENLYFQS-GT and TT-SQFTLNE-GT) were dissolved in 100%  
425 dimethyl sulfoxide and used to inhibit the chaperone effect of RS-mTEV in *in vitro* refolding  
426 assays.

427

#### 428 **Electrophoretic mobility shift assay (EMSA)**

429 Serially diluted and purified RS-mTEV, RS-mTEV<sub>sw</sub>, and RS-mTEV(N171A) were mixed  
430 with 2.5  $\mu$ M of purified EGFP-L. They were then incubated at room temperature for 30 min  
431 and separated on Native-PAGE gel. Before staining with Coomassie brilliant blue (EBP-  
432 1011; Elpis Biotech, Daejeon, Korea), a fluorescence image of the gel was captured.

433

#### 434 **Statistical analysis**

435 The error bars in each graph represent the mean  $\pm$  standard deviation of results obtained from  
436 triplicate experiments. Statistical significance was analyzed using Student's *t* test. A two-  
437 tailed P-value was considered statistically significant at  $P < 0.05$ .

438

439 **Data availability**

440 All data generated or analyzed during this study are included in this published article (and its  
441 supplementary information files).

442

443 **Acknowledgments**

444 We thank Helena Berglund for kindly providing the plasmid encoding an engineered  
445 Tobacco Etch Virus protease domain.

446

447 **Author contributions**

448 Conceptualization: Seong Il Choi

449 Formal analysis: Soon Bin Kwon, Hotcherl Jeong, Kyun-Hwan Kim, Baik L. Seong, Seong Il  
450 Choi

451 Funding acquisition: Baik L. Seong

452 Investigation: Soon Bin Kwon, Kisun Ryu

453 Methodology: Soon Bin Kwon, Kisun Ryu, Keo-Heun Lim, Seong Il Choi

454 Supervision: Baik Lin Seong, Seong Il Choi

455 Validation: Soon Bin Kwon

456 Visualization: Soon Bin Kwon, Ahyun Son, Seong Il Choi

457 Writing-original draft: Soon Bin Kwon, Ahyun Son, Baik L. Seong, Seong Il Choi

458

459 **Competing financial interests**

460 The authors declare no competing financial interests; details are available in the online  
461 version of the paper.

462

## 463 References

464

- 465 1. Baldwin AJ, Knowles TP, Tartaglia GG, Fitzpatrick AW, Devlin GL, Shammass SL, et  
466 al. Metastability of native proteins and the phenomenon of amyloid formation. *J Am*  
467 *Chem Soc.* 2011;133(36):14160-3.
- 468 2. Tartaglia GG, Pechmann S, Dobson CM, Vendruscolo M. Life on the edge: a link  
469 between gene expression levels and aggregation rates of human proteins. *Trends*  
470 *Biochem Sci.* 2007;32(5):204-6.
- 471 3. Balchin D, Hayer-Hartl M, Hartl FU. *In vivo* aspects of protein folding and quality  
472 control. *Science.* 2016;353(6294):aac4354.
- 473 4. Choi SI, Kwon S, Son A, Jeong H, Kim KH, Seong BL. Protein folding *in vivo*  
474 revisited. *Current Protein and Peptide Science.* 2013;14(8):721-33.
- 475 5. Chiti F, Dobson CM. Protein Misfolding, Amyloid Formation, and Human Disease:  
476 A Summary of Progress Over the Last Decade. *Annu Rev Biochem.* 2017;86:27-68.
- 477 6. Kim YE, Hipp MS, Bracher A, Hayer-Hartl M, Hartl FU. Molecular chaperone  
478 functions in protein folding and proteostasis. *Annu Rev Biochem.* 2013;82:323-55.
- 479 7. Hartl FU, Hayer-Hartl M. Molecular chaperones in the cytosol: from nascent chain  
480 to folded protein. *Science.* 2002;295(5561):1852-8.
- 481 8. Structural Genomics C, China Structural Genomics C, Northeast Structural  
482 Genomics C, Graslund S, Nordlund P, Weigelt J, et al. Protein production and purification.  
483 *Nat Methods.* 2008;5(2):135-46.
- 484 9. Agashe VR, Guha S, Chang HC, Genevaux P, Hayer-Hartl M, Stemp M, et al.  
485 Function of trigger factor and DnaK in multidomain protein folding: increase in yield at  
486 the expense of folding speed. *Cell.* 2004;117(2):199-209.
- 487 10. Apetri AC, Horwich AL. Chaperonin chamber accelerates protein folding through  
488 passive action of preventing aggregation. *Proc Natl Acad Sci U S A.*  
489 2008;105(45):17351-5.
- 490 11. Marchenko NY, Marchenkov VV, Semisotnov GV, Finkelstein AV. Strict  
491 experimental evidence that apo-chaperonin GroEL does not accelerate protein folding,  
492 although it does accelerate one of its steps. *Proc Natl Acad Sci U S A.*  
493 2015;112(50):E6831-2.
- 494 12. Gupta AJ, Haldar S, Milicic G, Hartl FU, Hayer-Hartl M. Active cage mechanism of  
495 chaperonin-assisted protein folding demonstrated at single-molecule level. *J Mol Biol.*  
496 2014;426(15):2739-54.
- 497 13. Georgescauld F, Popova K, Gupta AJ, Bracher A, Engen JR, Hayer-Hartl M, et al.  
498 GroEL/ES chaperonin modulates the mechanism and accelerates the rate of TIM-barrel  
499 domain folding. *Cell.* 2014;157(4):922-34.
- 500 14. Libich DS, Tugarinov V, Clore GM. Intrinsic unfoldase/foldase activity of the  
501 chaperonin GroEL directly demonstrated using multinuclear relaxation-based NMR.  
502 *Proc Natl Acad Sci U S A.* 2015;112(29):8817-23.
- 503 15. Horowitz S, Koldewey P, Stull F, Bardwell JC. Folding while bound to chaperones.  
504 *Curr Opin Struct Biol.* 2017;48:1-5.
- 505 16. Koldewey P, Stull F, Horowitz S, Martin R, Bardwell JCA. Forces Driving  
506 Chaperone Action. *Cell.* 2016;166(2):369-79.
- 507 17. Patzelt H, Rudiger S, Brehmer D, Kramer G, Vorderwulbecke S, Schaffitzel E, et al.  
508 Binding specificity of Escherichia coli trigger factor. *Proc Natl Acad Sci U S A.*  
509 2001;98(25):14244-9.

- 510 18. Ellgaard L, Helenius A. Quality control in the endoplasmic reticulum. *Nat Rev Mol*  
511 *Cell Biol.* 2003;4(3):181-91.
- 512 19. Richarme G, Kohiyama M. Amino acid specificity of the Escherichia coli  
513 chaperone GroEL (heat shock protein 60). *J Biol Chem.* 1994;269(10):7095-8.
- 514 20. Pappenberger G, Wilsher JA, Roe SM, Counsell DJ, Willison KR, Pearl LH. Crystal  
515 structure of the CCTgamma apical domain: implications for substrate binding to the  
516 eukaryotic cytosolic chaperonin. *J Mol Biol.* 2002;318(5):1367-79.
- 517 21. Wayne N, Bolon DN. Charge-rich regions modulate the anti-aggregation activity  
518 of Hsp90. *J Mol Biol.* 2010;401(5):931-9.
- 519 22. Ryu K, Kim CW, Kim BH, Han KS, Kim KH, Choi SI, et al. Assessment of substrate-  
520 stabilizing factors for DnaK on the folding of aggregation-prone proteins. *Biochem*  
521 *Biophys Res Commun.* 2008;373(1):74-9.
- 522 23. Kim CW, Han KS, Ryu KS, Kim BH, Kim KH, Choi SI, et al. N-terminal domains of  
523 native multidomain proteins have the potential to assist *de novo* folding of their  
524 downstream domains *in vivo* by acting as solubility enhancers. *Protein Sci.*  
525 2007;16(4):635-43.
- 526 24. Ellis RJ, Hartl FU. Principles of protein folding in the cellular environment. *Curr*  
527 *Opin Struct Biol.* 1999;9(1):102-10.
- 528 25. Feldman DE, Frydman J. Protein folding *in vivo*: the importance of molecular  
529 chaperones. *Curr Opin Struct Biol.* 2000;10(1):26-33.
- 530 26. Maier T, Ferbitz L, Deuerling E, Ban N. A cradle for new proteins: trigger factor at  
531 the ribosome. *Curr Opin Struct Biol.* 2005;15(2):204-12.
- 532 27. Schimmele B, Grafe N, Pluckthun A. Ribosome display of mammalian receptor  
533 domains. *Protein Eng Des Sel.* 2005;18(6):285-94.
- 534 28. Waugh DS. Making the most of affinity tags. *Trends Biotechnol.* 2005;23(6):316-  
535 20.
- 536 29. Wittrup KD. Protein engineering by cell-surface display. *Curr Opin Biotechnol.*  
537 2001;12(4):395-9.
- 538 30. Choi SI, Han KS, Kim CW, Ryu KS, Kim BH, Kim KH, et al. Protein solubility and  
539 folding enhancement by interaction with RNA. *PLoS One.* 2008;3(7):e2677.
- 540 31. Brandt F, Etchells SA, Ortiz JO, Elcock AH, Hartl FU, Baumeister W. The native 3D  
541 organization of bacterial polysomes. *Cell.* 2009;136(2):261-71.
- 542 32. Kaiser CM, Goldman DH, Chodera JD, Tinoco I, Jr., Bustamante C. The ribosome  
543 modulates nascent protein folding. *Science.* 2011;334(6063):1723-7.
- 544 33. Wruck F, Katranidis A, Nierhaus KH, Buldt G, Hegner M. Translation and folding  
545 of single proteins in real time. *Proc Natl Acad Sci U S A.* 2017;114(22):E4399-E407.
- 546 34. Choi SI, Ryu K, Seong BL. RNA-mediated chaperone type for *de novo* protein  
547 folding. *RNA Biol.* 2009;6(1):21-4.
- 548 35. Olsen SN, Andersen KB, Randolph TW, Carpenter JF, Westh P. Role of  
549 electrostatic repulsion on colloidal stability of Bacillus halmapalus alpha-amylase.  
550 *Biochim Biophys Acta.* 2009;1794(7):1058-65.
- 551 36. Ortega-Vinuesa JL, Mart, iacute, n R, iacute, guez A, et al. Colloidal Stability of  
552 Polymer Colloids with Different Interfacial Properties: Mechanisms. *J Colloid Interface*  
553 *Sci.* 1996;184(1):259-67.
- 554 37. Santner AA, Croy CH, Vasanwala FH, Uversky VN, Van YY, Dunker AK. Sweeping  
555 away protein aggregation with entropic bristles: intrinsically disordered protein fusions  
556 enhance soluble expression. *Biochemistry.* 2012;51(37):7250-62.

- 557 38. Grana-Montes R, Marinelli P, Reverter D, Ventura S. N-terminal protein tails act  
558 as aggregation protective entropic bristles: the SUMO case. *Biomacromolecules*.  
559 2014;15(4):1194-203.
- 560 39. De Los Rios P, Ben-Zvi A, Slutsky O, Azem A, Goloubinoff P. Hsp70 chaperones  
561 accelerate protein translocation and the unfolding of stable protein aggregates by  
562 entropic pulling. *Proc Natl Acad Sci U S A*. 2006;103(16):6166-71.
- 563 40. Choi SI, Son A, Lim KH, Jeong H, Seong BL. Macromolecule-assisted *de novo*  
564 protein folding. *Int J Mol Sci*. 2012;13(8):10368-86.
- 565 41. Phan J, Zdanov A, Evdokimov AG, Tropea JE, Peters HK, 3rd, Kapust RB, et al.  
566 Structural basis for the substrate specificity of tobacco etch virus protease. *J Biol Chem*.  
567 2002;277(52):50564-72.
- 568 42. Kapust RB, Waugh DS. *Escherichia coli* maltose-binding protein is uncommonly  
569 effective at promoting the solubility of polypeptides to which it is fused. *Protein Sci*.  
570 1999;8(8):1668-74.
- 571 43. Lee SH, Cha EJ, Lim JE, Kwon SH, Kim DH, Cho H, et al. Structural characterization  
572 of an intrinsically unfolded mini-HBX protein from hepatitis B virus. *Mol Cells*.  
573 2012;34(2):165-9.
- 574 44. Hanse EA, Ruan C, Kachman M, Wang D, Lowman XH, Kelekar A. Cytosolic malate  
575 dehydrogenase activity helps support glycolysis in actively proliferating cells and  
576 cancer. *Oncogene*. 2017;36(27):3915-24.
- 577 45. Folkman J. Antiangiogenesis in cancer therapy--endostatin and its mechanisms  
578 of action. *Exp Cell Res*. 2006;312(5):594-607.
- 579 46. Morris KT, Khan H, Ahmad A, Weston LL, Nofchissey RA, Pinchuk IV, et al. G-CSF  
580 and G-CSFR are highly expressed in human gastric and colon cancers and promote  
581 carcinoma cell proliferation and migration. *Br J Cancer*. 2014;110(5):1211-20.
- 582 47. Pilarsky C, Ammerpohl O, Sipos B, Dahl E, Hartmann A, Wellmann A, et al.  
583 Activation of Wnt signalling in stroma from pancreatic cancer identified by gene  
584 expression profiling. *J Cell Mol Med*. 2008;12(6B):2823-35.
- 585 48. van den Berg S, Lofdahl PA, Hard T, Berglund H. Improved solubility of TEV  
586 protease by directed evolution. *J Biotechnol*. 2006;121(3):291-8.
- 587 49. Slagle BL, Bouchard MJ. Hepatitis B Virus X and Regulation of Viral Gene  
588 Expression. *Cold Spring Harb Perspect Med*. 2016;6(3):a021402.
- 589 50. Waldo GS, Standish BM, Berendzen J, Terwilliger TC. Rapid protein-folding assay  
590 using green fluorescent protein. *Nat Biotechnol*. 1999;17(7):691-5.
- 591 51. McGuffee SR, Elcock AH. Diffusion, crowding & protein stability in a dynamic  
592 molecular model of the bacterial cytoplasm. *PLoS Comput Biol*. 2010;6(3):e1000694.
- 593 52. Mu X, Choi S, Lang L, Mowray D, Dokholyan NV, Danielsson J, et al.  
594 Physicochemical code for quinary protein interactions in *Escherichia coli*. *Proc Natl*  
595 *Acad Sci U S A*. 2017;114(23):E4556-E63.
- 596 53. Basters A, Ketscher L, Deuerling E, Arkona C, Rademann J, Knobeloch KP, et al.  
597 High yield expression of catalytically active USP18 (UBP43) using a Trigger Factor  
598 fusion system. *BMC Biotechnol*. 2012;12:56.
- 599 54. Kyratsous CA, Silverstein SJ, DeLong CR, Panagiotidis CA. Chaperone-fusion  
600 expression plasmid vectors for improved solubility of recombinant proteins in  
601 *Escherichia coli*. *Gene*. 2009;440(1-2):9-15.
- 602 55. Kudlicki W, Coffman A, Kramer G, Hardesty B. Ribosomes and ribosomal RNA as  
603 chaperones for folding of proteins. *Fold Des*. 1997;2(2):101-8.



- 604 56. Sorensen HP, Kristensen JE, Sperling-Petersen HU, Mortensen KK. Soluble  
605 expression of aggregating proteins by covalent coupling to the ribosome. *Biochem*  
606 *Biophys Res Commun.* 2004;319(3):715-9.
- 607 57. Spiess C, Beil A, Ehrmann M. A temperature-dependent switch from chaperone to  
608 protease in a widely conserved heat shock protein. *Cell.* 1999;97(3):339-47.
- 609 58. Leonhard K, Stiegler A, Neupert W, Langer T. Chaperone-like activity of the AAA  
610 domain of the yeast Yme1 AAA protease. *Nature.* 1999;398(6725):348-51.
- 611 59. Docter BE, Horowitz S, Gray MJ, Jakob U, Bardwell JC. Do nucleic acids moonlight  
612 as molecular chaperones? *Nucleic Acids Res.* 2016;44(10):4835-45.
- 613 60. Horowitz S, Bardwell JC. RNAs as chaperones. *RNA Biol.* 2016;13(12):1228-31.
- 614 61. Son A, Choi SI, Han G, Seong BL. M1 RNA is important for the in-cell solubility of  
615 its cognate C5 protein: Implications for RNA-mediated protein folding. *RNA Biol.*  
616 2015;12(11):1198-208.
- 617 62. Kim JM, Choi HS, Seong BL. The folding competence of HIV-1 Tat mediated by  
618 interaction with TAR RNA. *RNA Biol.* 2017;14(7):926-37.
- 619 63. Kim HK, Choi SI, Seong BL. 5S rRNA-assisted DnaK refolding. *Biochem Biophys*  
620 *Res Commun.* 2010;391(2):1177-81.
- 621 64. Gestwicki JE, Crabtree GR, Graef IA. Harnessing chaperones to generate small-  
622 molecule inhibitors of amyloid beta aggregation. *Science.* 2004;306(5697):865-9.
- 623 65. Jang YH, Cho SH, Son A, Lee YH, Lee J, Lee KH, et al. High-yield soluble expression  
624 of recombinant influenza virus antigens from *Escherichia coli* and their potential uses in  
625 diagnosis. *J Virol Methods.* 2014;196:56-64.
- 626

627 **Figure legends**

628

629 **Fig 1. Experimental design for conversion of a soluble protein into a chaperone.**

630 Schematic diagram for the construction of an artificial chaperone system to assess the  
631 intrinsic chaperone activity of soluble cellular macromolecules. A TEV protease-domain  
632 mutant (mTEV) with no proteolytic activity but the binding ability toward its canonical  
633 sequence of 7 residues (denoted as “L”; red bar) was fused to the C-terminus of *E. coli* RS,  
634 yielding an artificial chaperone, RS-mTEV. EGFP-HBx harboring “L” tag is a client protein  
635 of RS-mTEV.

636

637 **Fig 2. RS-mTEV exhibits potent chaperone activity upon binding to aggregation-prone**

638 **proteins in *E. coli*.** (a) Effect of co-expression of RS-mTEV on the solubility and folding of  
639 L-EGFP-HBx. RS-mTEV was co-expressed with L-EGFP-HBx, L(m)-EGFP-HBx, and  
640 EGFP-HBx, respectively. As negative controls, mock vector pLysE (Control), RS, RS-  
641 mTEV(N171A), L(m)-EGFP-HBx, and EGFP-HBx were used. RS-mTEV(N171A) and  
642 L(m)-EGFP-HBx harbor the mutations in mTEV and “L” tag, respectively, critical to the  
643 substrate protein recognition. Proteins were expressed at 25 °C. The total lysate (T), soluble  
644 fraction (S), and pellet (P) of each sample were subjected to SDS-PAGE and western blot  
645 analyses. Both solubility on SDS-PAGE and the fluorescence intensity of the EGFP fusion  
646 proteins in each soluble fraction were measured and compared. The same analytical methods  
647 were used for the following Figs 3-5. Throughout this paper, black and red arrows indicate  
648 artificial chaperones (equivalent or control) and substrate proteins, respectively. (b) RS-  
649 mTEV concentration-dependent chaperone activity. RS-mTEV co-expression was controlled  
650 by different concentrations (0–0.02%) of L-arabinose. RS was used as a control.

651

652 **Fig 3. RS-mTEV acts as a chaperone, independently of the recognition tag-position.** The  
653 “L” tag was placed either in the linker region between EGFP and HBx (EGFP-L-HBx) or at  
654 the C-terminus of protein (EGFP-HBx-L). Effect of RS-mTEV coexpression on the solubility  
655 and fluorescent intensity of EGFP-L-HBx and EGFP-HBx-L was analyzed as described in  
656 Fig. 2. RS was used as a control.

657

658 **Fig 4. Comparison of RS-mTEV with the representative *E. coli* chaperones.** (a) Client  
659 proteins co-expressed with RS, RS-mTEV, GroELS, DnaKJE, and TF, respectively, were L-  
660 EGFP-HBx, EGFP-HBx-L and EGFP-HBx, as well as endostatin, GCSF, Ap1m2, and  
661 hMDH. Their expression patterns on SDS-PAGE were highlighted. (b) Comparison of EGFP  
662 fluorescence of L-EGFP-HBx, EGFP-HBx-L, and EGFP-HBx of the results shown in a. (c)  
663 Comparison of protein solubility of the substrate proteins in a.

664

665 **Fig 5. RS-mTEV chaperone activity is largely dependent on RS rather than mTEV.** To  
666 distinguish between the contributions of RS and mTEV to the RS-mTEV chaperone activity,  
667 the chaperone activities of three proteins (mTEV, N-mTEV, and RS-mTEV) and their  
668 corresponding more soluble variants (mTEV<sub>sw</sub>, N-mTEV<sub>sw</sub>, and RS-mTEV<sub>sw</sub>) were  
669 compared. Here N represents the N-terminal domain of RS. (a) Solubility of mTEV, N-  
670 mTEV, RS-mTEV, mTEV<sub>sw</sub>, N-mTEV<sub>sw</sub>, and RS-mTEV<sub>sw</sub> at 25 °C and 37 °C. (b)  
671 Comparison of the chaperone activities of mTEV, N-mTEV, and RS-mTEV for L-EGFP-  
672 HBx at 25 °C. The mTEV and its fusion variants are indicated by black arrows, and the red  
673 arrow indicates L-EGFP-HBx. (c) Comparison of the chaperone activity of mTEV<sub>sw</sub>, N-  
674 mTEV<sub>sw</sub>, and RS-mTEV<sub>sw</sub> at 25 °C under the same conditions as described in b.

675 Highlighted bands below main SDS-PAGE data in **b** and **c** represent mTEV and mTEVsw,  
676 respectively. **(d)** Solubility and fluorescence intensity of each sample in **b** and **c**.

677

678 **Fig 6. Characterization of the chaperone function of RS-mTEV *in vitro*.** **(a)** Refolding  
679 kinetics of EGFP-HBx-L (1.6  $\mu$ M) in the presence of RS-mTEV (2.5  $\mu$ M) was monitored as a  
680 function of time (0, 15, 45, and 75 min). RS and PBS buffer were used as controls. **(b)** Dose-  
681 dependent effects of RS-mTEV on EGFP-HBx-L refolding. EGFP fluorescence of the  
682 refolded proteins at concentration (0–5  $\mu$ M) of RS-mTEV (or RS) was measured at 75 min  
683 after initiation of refolding. **(c)** Loss of RS-mTEV chaperone activity at 10-fold lower  
684 substrate concentrations as compared with those in **a**. **(d)** Specific inhibitory effect of the  
685 peptide on RS-mTEV chaperone activity. Refolding experiments were similar to those  
686 described in **b**, except for the presence of competing (L) or non-competing [L(m)] peptide.

687

## 688 **Supporting information**

689 **S1 Fig. Expression of mTEV and its derivatives in *E. coli*.** mTEV, N-mTEV, and RS-  
690 mTEV were expressed in *E. coli* at 25 °C and 37 °C. N and RS represent the N-terminal  
691 domain of *E. coli* LysRS and the whole LysRS, respectively. More soluble mTEV variant  
692 (mTEV<sub>sw</sub>) and its derivative (RS-mTEV<sub>sw</sub>) were also expressed in *E. coli* at 37 °C. The  
693 solubilities of the three mTEV variants expressed at 25 °C were similar, whereas that of  
694 mTEV decreased at 37 °C. mTEV<sub>sw</sub> alone was highly soluble even at 37 °C.

695

696 **S2 Fig. Diagram of co-expression vectors used for aggregation-prone proteins and**  
697 **artificial chaperones.** pGET7 vector used for the expression of aggregation-prone substrate  
698 proteins harbors an ampicillin-resistance gene and a pUC19 origin of replication. Protein  
699 expression under control of T7 promoter was induced by IPTG. pLysEpBAD used for  
700 chaperone expression carries a chloramphenicol-resistance gene and a p15A origin of  
701 replication. Expression of artificial chaperones under control the pBAD promoter was  
702 triggered by L-arabinose.

703

704 **S3 Fig. Interaction of the “L” tag with RS-mTEV, RS-mTEV<sub>sw</sub>, and RS-mTEV**  
705 **(N171A).** EGFP-L was mixed with varying concentrations of RS-mTEV, RS-mTEV<sub>sw</sub>, or  
706 RS-mTEV (N171A), and then the binding between them was analyzed by mobility shift on  
707 native PAGE. Fluorescence images were first obtained (right), and then staining with  
708 Coomassie brilliant blue (left) was performed.

709

710 **S4 Fig. Mutation of the “L” tag in L-EGFP-HBx alters interaction with RS-mTEV.** A  
711 mutation was introduced in the conserved residues of the “L” tag, and the resulting mutant  
712 variants [L(m), L(m1), L(m2), and L(m3)] were attached to the N-terminus of EGFP-HBx,

713 respectively. These proteins were co-expressed with RS-mTEV in *E. coli*. Mutated sequences  
714 in the “L” tag are indicated in red. Expressed proteins were analyzed by SDS-PAGE and  
715 verified by fluorescence (histogram, right).

716

717 **S5 Fig. Confirmation of the expression of RS, RS-mTEV, and molecular chaperones.** RS,  
718 RS-mTEV, GroELS, DnaKJE, and TF were expressed in *E. coli*, and their expression was  
719 analyzed SDS-PAGE. Each target band is indicated by an arrow. In the case of GroELS, the  
720 SDS-PAGE (down) was added to clearly see the expression of groES, a relatively small sized  
721 protein, which was run through in the upper SDS-PAGE obtained after a long running time  
722 for a good resolution.

723

724 **S6 Fig. The N-terminal MSEQ tag increases the expression of the substrate proteins of**  
725 **RS-mTEV.** (a) EGFP-HBx-L in the presence or absence of this tag was expressed in *E. coli*  
726 at 37 °C and induced at various IPTG concentrations (0–40 μM). Total lysates of each sample  
727 were analyzed by SDS-PAGE and western blot. Red arrows indicate EGFP-HBx-L  
728 expression. (b) EGFP-HBx-L in the presence or absence of the tag was expressed in *E. coli* at  
729 25 °C (induced by 100 μM IPTG) along with RS or RS-mTEV co-expression, followed by  
730 SDS-PAGE analysis.

731

< New Chaperone concept >

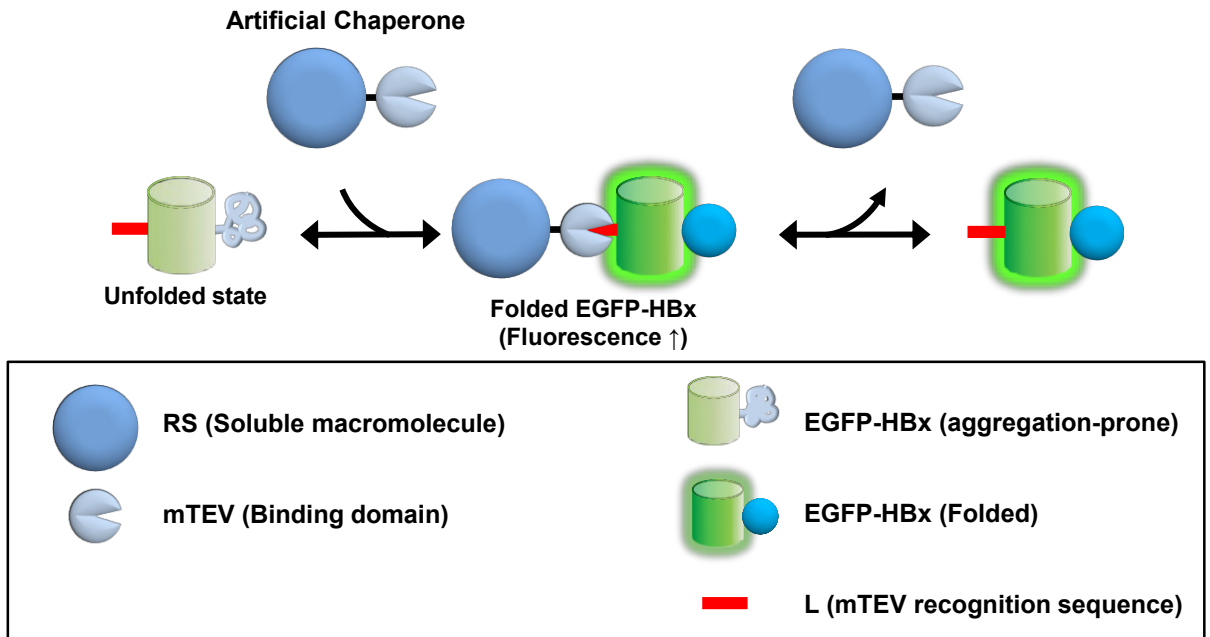

**Kwon *et al.* Figure 1.**

**a**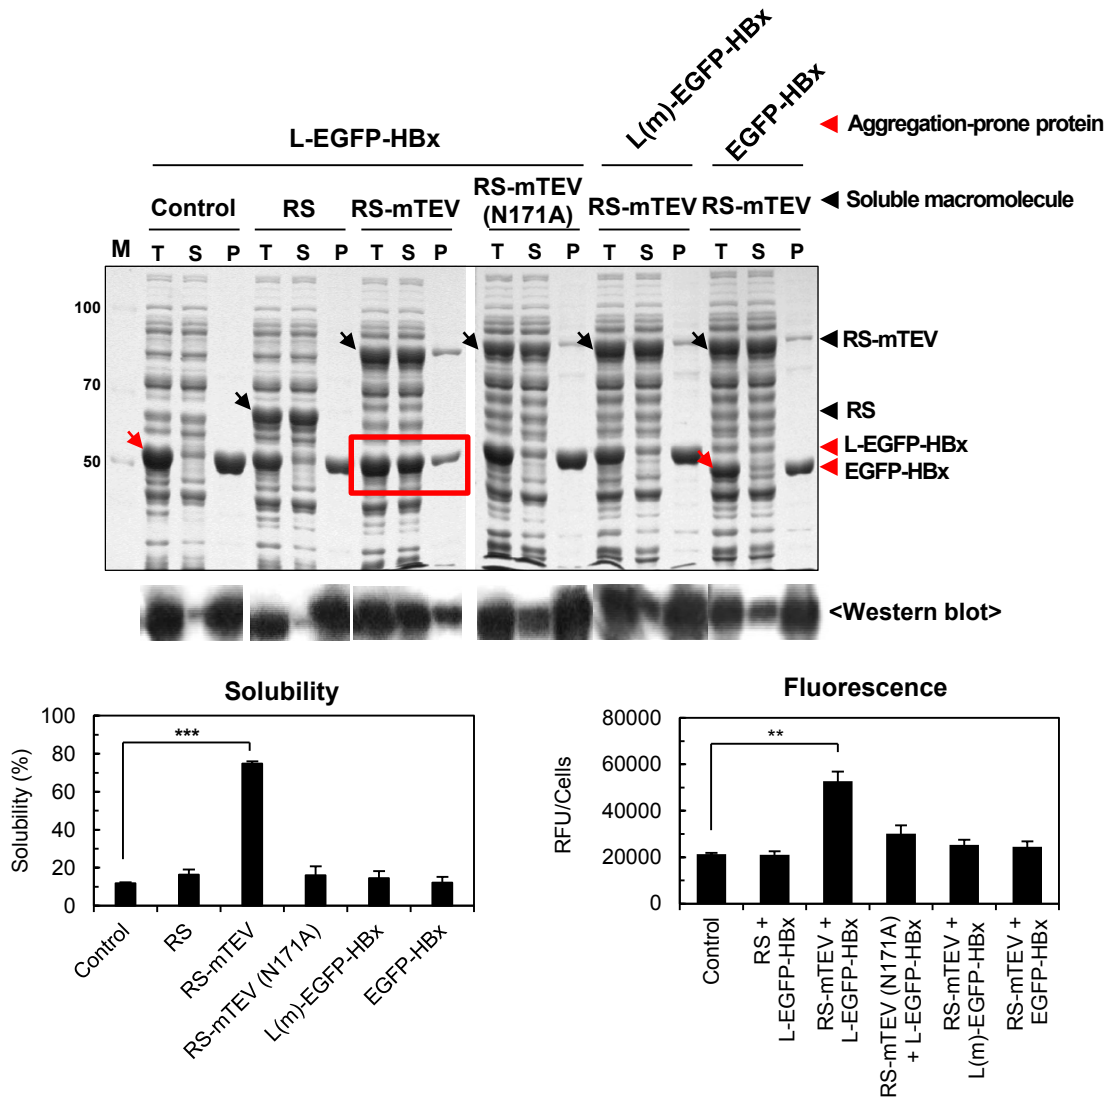**b**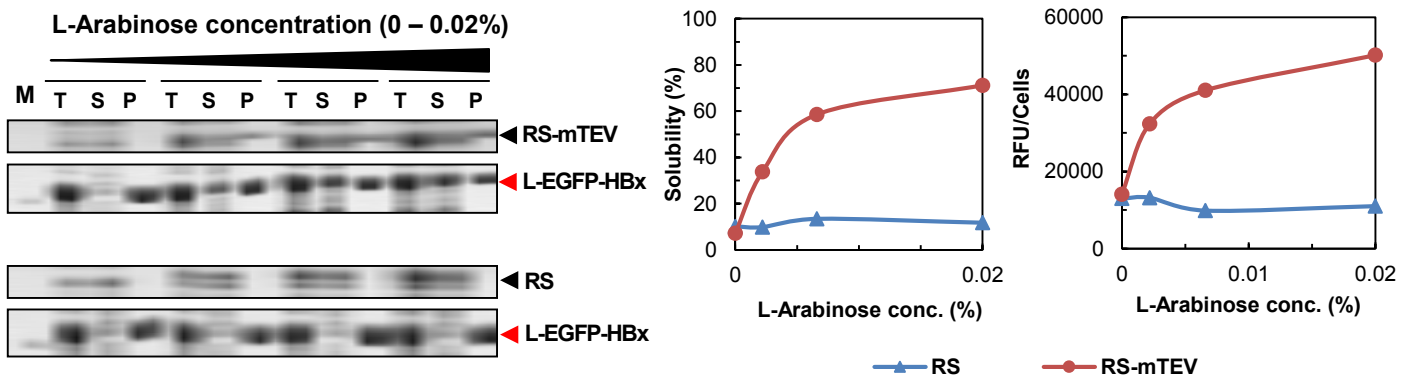**Kwon et al. Figure 2.**



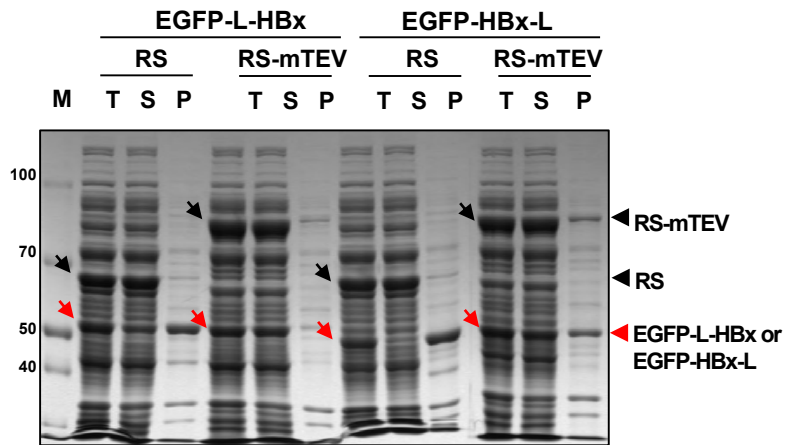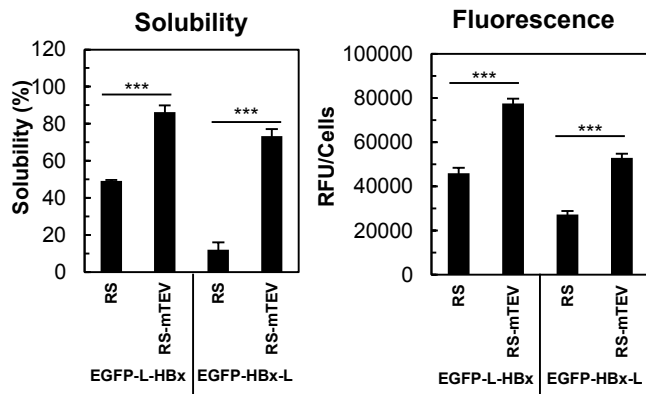

**Kwon *et al.* Figure 3.**

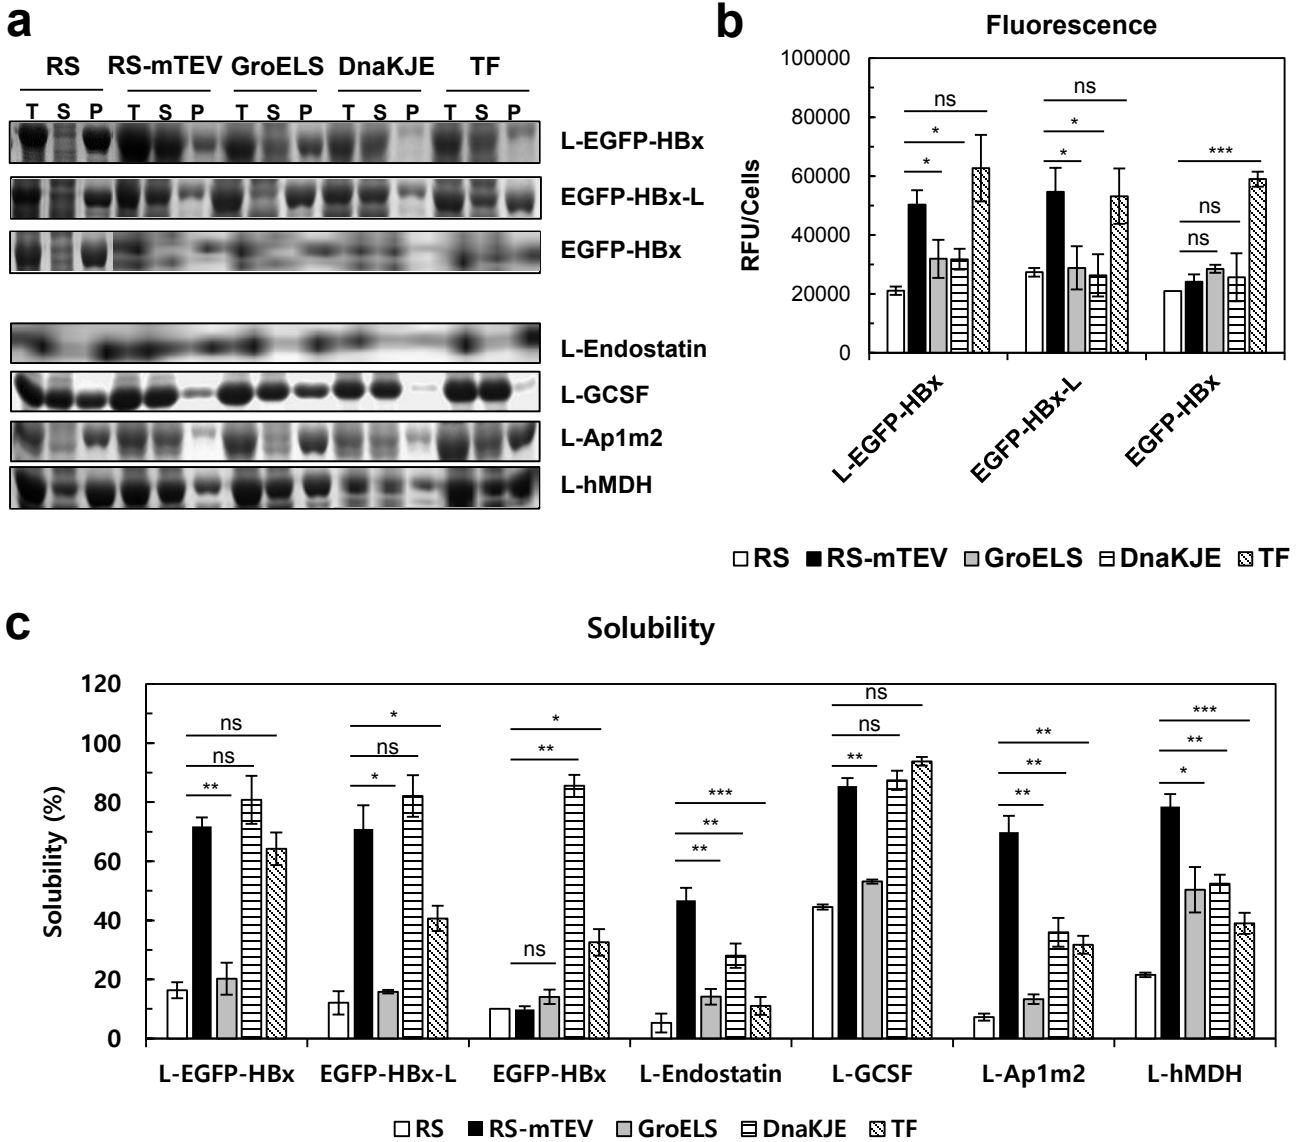

**Kwon et al. Figure 4.**

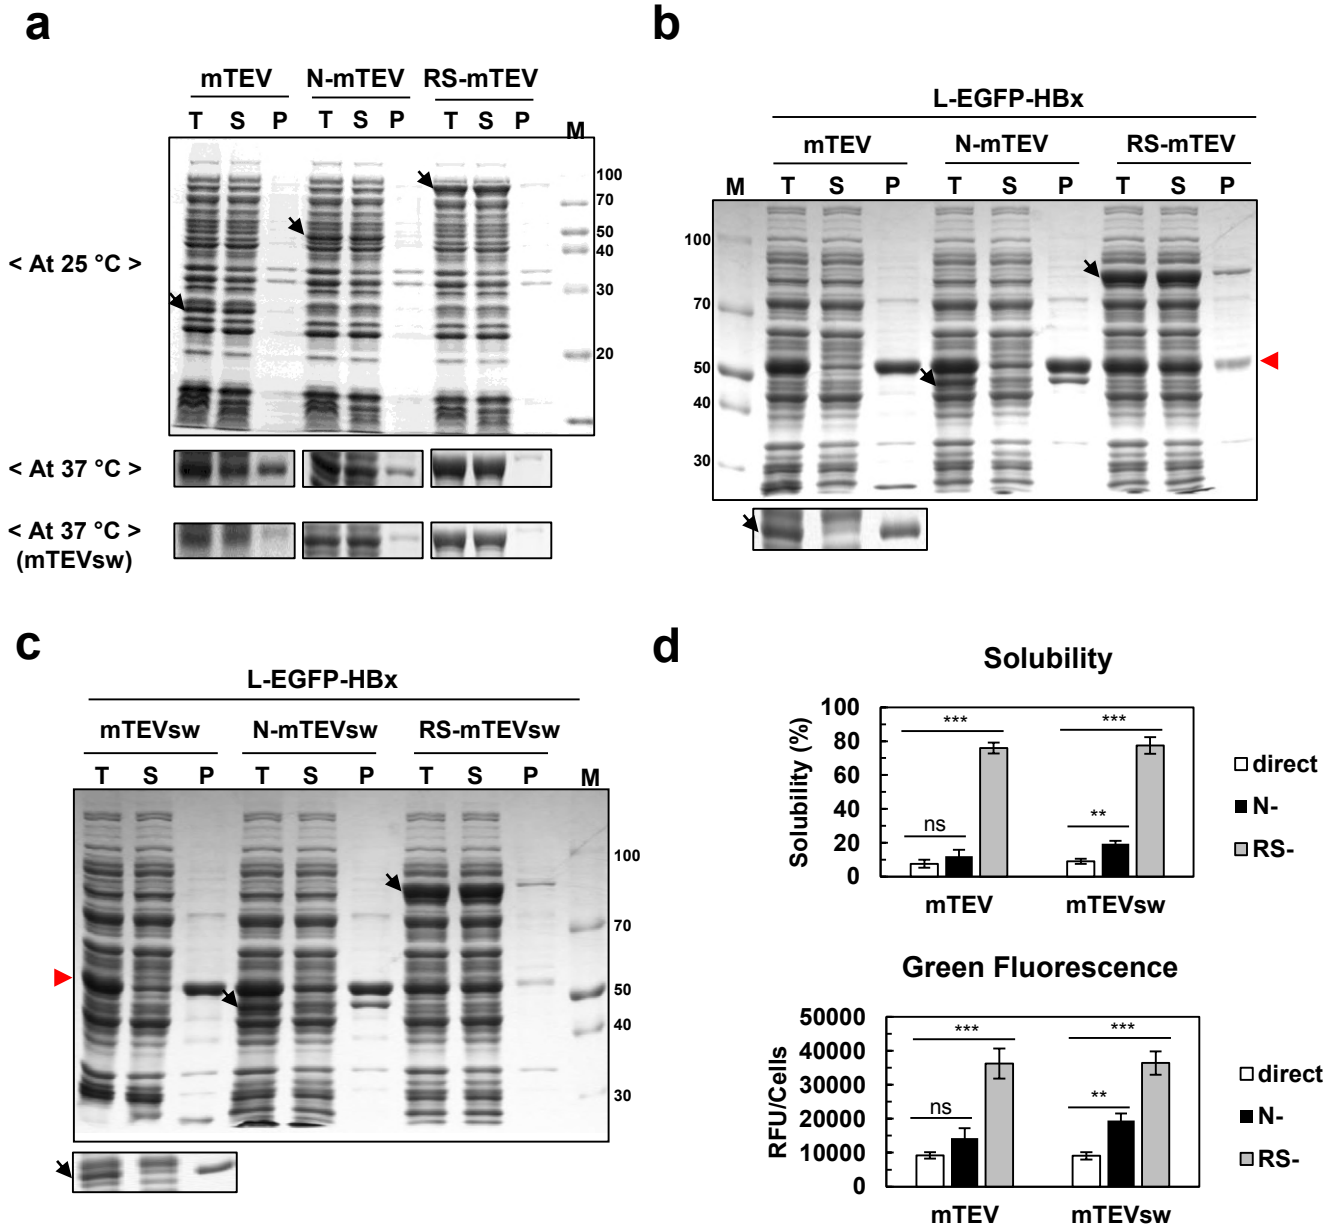

**Kwon et al. Figure 5.**

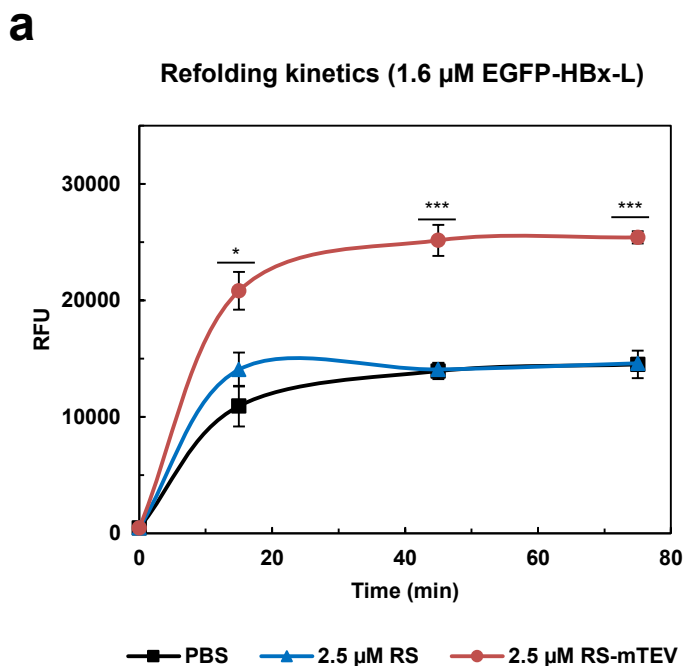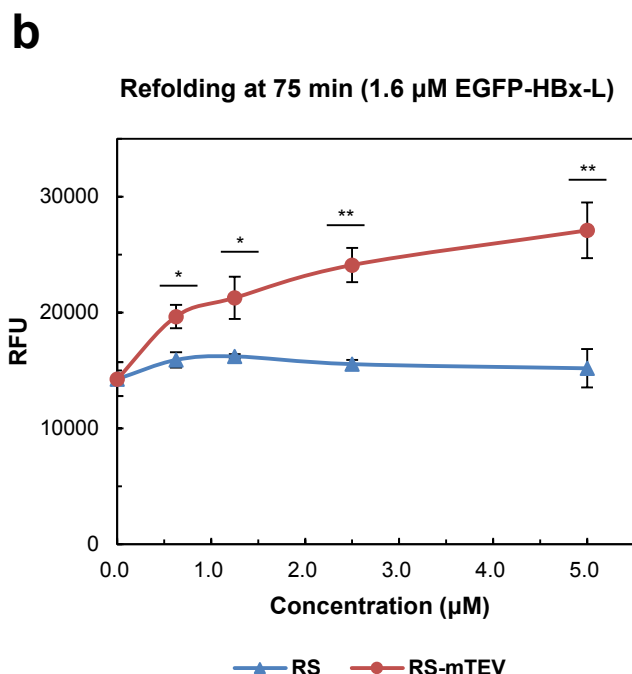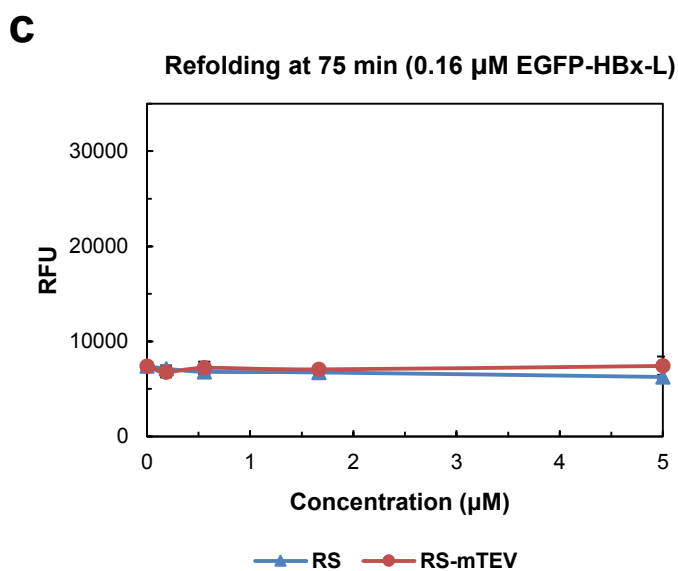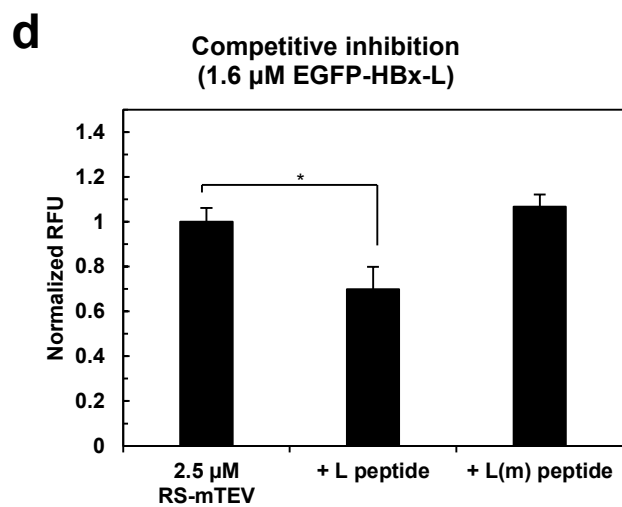

**Kwon *et al.* Figure 6.**

Artificial chaperone in pGE-T7 vector  
(High-expression vector)

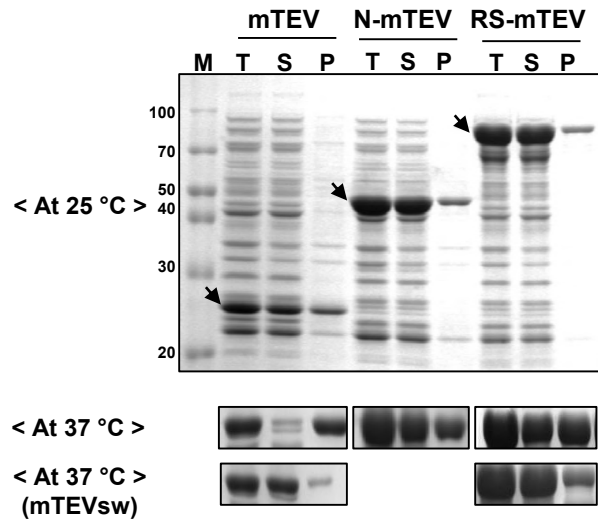

**Kwon *et al.* Supplementary Figure 1.**

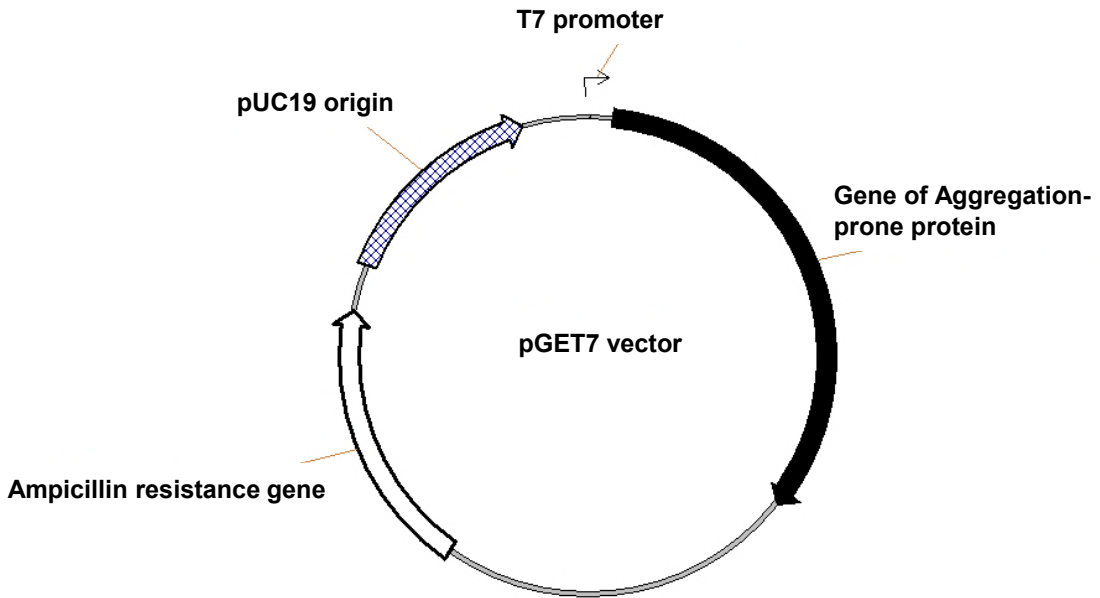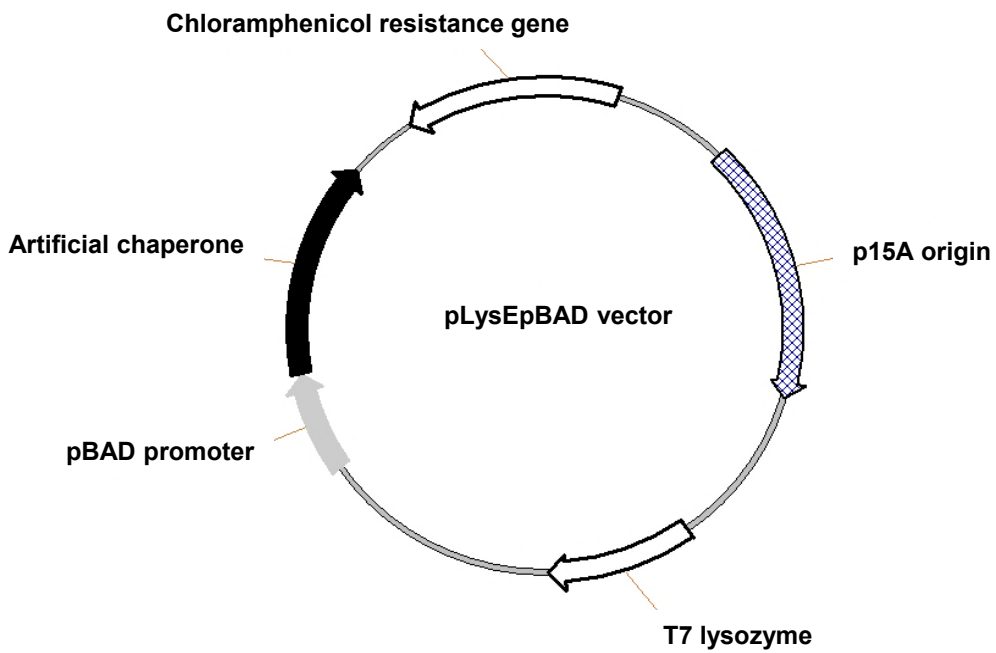

**Kwon *et al.* Supplementary Figure 2.**

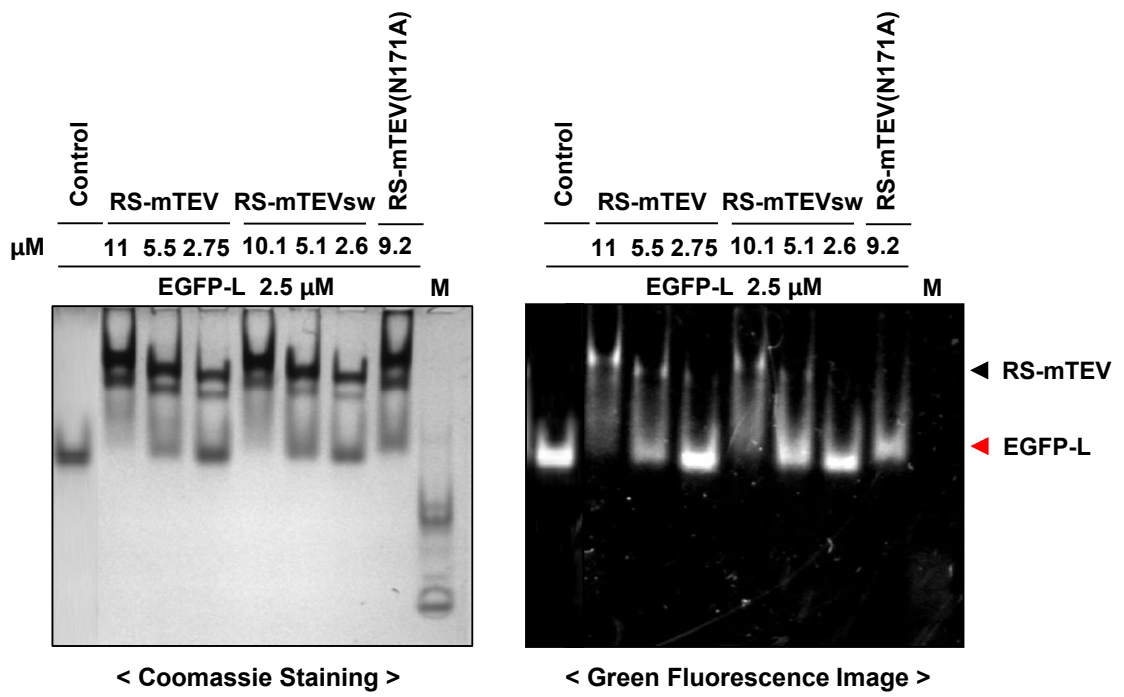

**Kwon *et al.* Supplementary Figure 3.**

**L** : ENLYFQG  
**L(m)** : YNLEFQG  
**L(m1)** : ENLQFYG  
**L(m2)** : YNLQFEG  
**L(m3)** : QNLEFYG

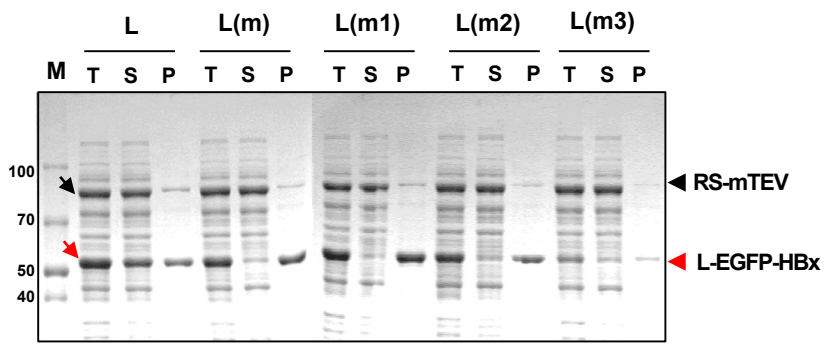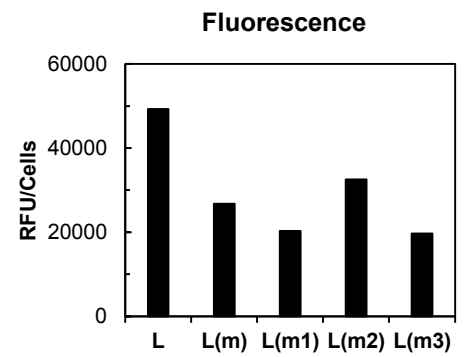

**Kwon *et al.* Supplementary Figure 4.**



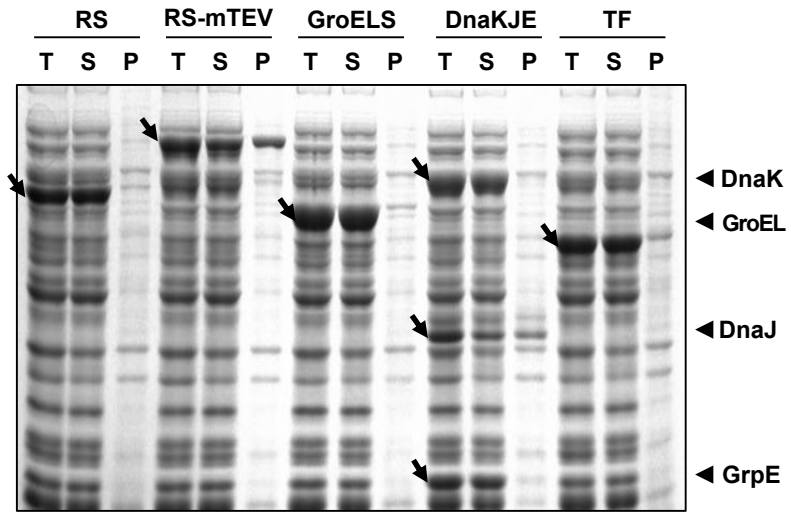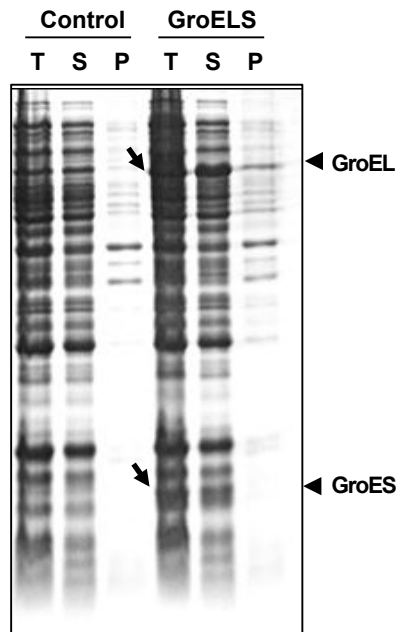

**Kwon *et al.* Supplementary Figure 5.**

**a**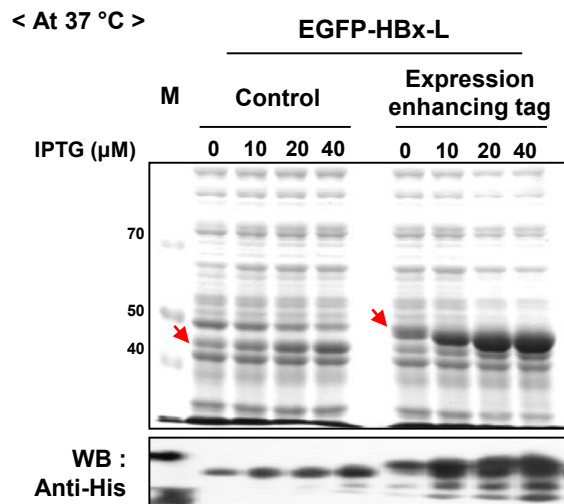**b**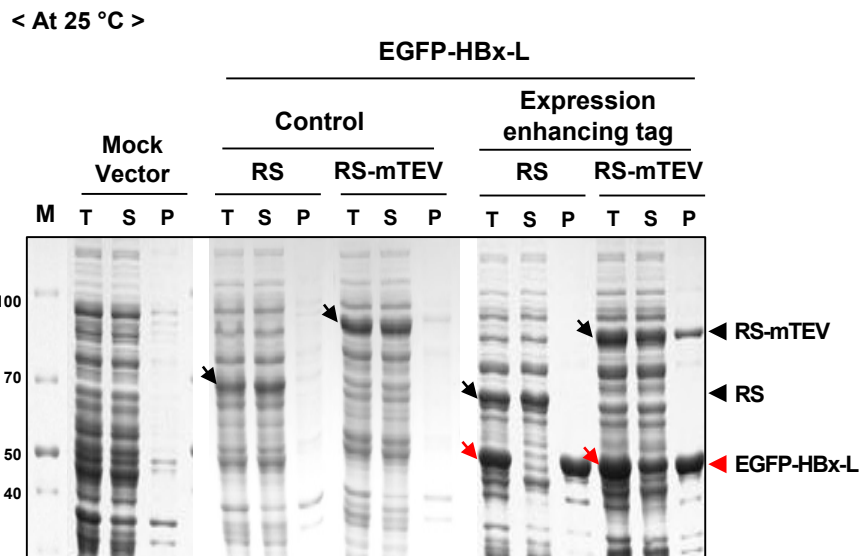

**Kwon *et al.* Supplementary Figure 6.**
